# Supplementary material for: Differential Tolerance to Direct and Indirect Density-Dependent Costs of Viral Infection in Arabidopsis thaliana
Source: PubMed Central journal article supplement (PMC2712083; doi:10.1371/journal.ppat.1000531), 2009-07-31
Supplement: ppat.1000531.s002.pdf [file ppat.1000531.s002.pdf]

**Table S1.** Statistical parameters of virus effects on plant life-history traits.

| Accession       | Treatment         | <i>RW</i>     | <i>RW</i> / <i>RW<sub>m</sub></i> | <i>IW</i>      | <i>IW</i> / <i>IW<sub>m</sub></i> | <i>SW</i>     | <i>SW</i> / <i>SW<sub>m</sub></i> | <i>SW</i> / <i>RW</i> |
|-----------------|-------------------|---------------|-----------------------------------|----------------|-----------------------------------|---------------|-----------------------------------|-----------------------|
| <b>Boa-0</b>    | <i>M</i>          | 0.500 ± 0.039 | -                                 | 0.327 ± 0.048  | -                                 | 0.039 ± 0.005 | -                                 | 0.083 ± 0.003         |
|                 | <i>I</i>          | 0.350 ± 0.032 | 0.690 ± 0.083                     | 0.314 ± 0.030  | 0.965 ± 0.031                     | 0.037 ± 0.004 | 0.954 ± 0.051                     | 0.106 ± 0.006         |
|                 | <i>M/M</i>        | 0.256 ± 0.017 | -                                 | 0.180 ± 0.014  | -                                 | 0.022 ± 0.002 | -                                 | 0.091 ± 0.014         |
|                 | <i>I/I</i>        | 0.194 ± 0.014 | 0.755 ± 0.053                     | 0.167 ± 0.021  | 0.931 ± 0.059                     | 0.014 ± 0.002 | 0.662 ± 0.109                     | 0.083 ± 0.016         |
|                 | <i>M/M/M/M(M)</i> | 0.167 ± 0.014 | -                                 | 0.136 ± 0.020  | -                                 | 0.011 ± 0.002 | -                                 | 0.074 ± 0.016         |
|                 | <i>I/I/I(I)</i>   | 0.149 ± 0.012 | 0.908 ± 0.080                     | 0.095 ± 0.017  | 0.705 ± 0.134                     | 0.005 ± 0.001 | 0.425 ± 0.093                     | 0.038 ± 0.009         |
|                 | <i>M/I(M)</i>     | 0.234 ± 0.016 | -                                 | 0.182 ± 0.025  | -                                 | 0.023 ± 0.003 | -                                 | 0.099 ± 0.006         |
|                 | <i>M/I(I)</i>     | 0.144 ± 0.015 | 0.666 ± 0.040                     | 0.108 ± 0.023  | 0.647 ± 0.049                     | 0.015 ± 0.002 | 0.475 ± 0.021                     | 0.120 ± 0.009         |
|                 | <i>M/M/M/I(M)</i> | 0.172 ± 0.016 | -                                 | 0.101 ± 0.015  | -                                 | 0.006 ± 0.002 | -                                 | 0.038 ± 0.009         |
|                 | <i>M/M/M/I(I)</i> | 0.112 ± 0.011 | 0.649 ± 0.091                     | 0.081 ± 0.010  | 0.777 ± 0.051                     | 0.004 ± 0.001 | 0.712 ± 0.046                     | 0.063 ± 0.008         |
|                 | <i>M/M/I(M)</i>   | 0.182 ± 0.013 | -                                 | 0.109 ± 0.018  | -                                 | 0.007 ± 0.001 | -                                 | 0.025 ± 0.011         |
|                 | <i>M/M/I(I)</i>   | 0.134 ± 0.008 | 0.742 ± 0.046                     | 0.094 ± 0.016  | 0.856 ± 0.152                     | 0.006 ± 0.001 | 0.812 ± 0.065                     | 0.047 ± 0.009         |
|                 | <i>M/I/M(M)</i>   | 0.188 ± 0.023 | -                                 | 0.118 ± 0.020  | -                                 | 0.004 ± 0.001 | -                                 | 0.020 ± 0.008         |
|                 | <i>M/I/M/I(I)</i> | 0.133 ± 0.013 | 0.705 ± 0.072                     | 0.092 ± 0.014  | 0.776 ± 0.122                     | 0.003 ± 0.001 | 0.752 ± 0.094                     | 0.038 ± 0.007         |
|                 | <i>M/I/I(M)</i>   | 0.216 ± 0.019 | -                                 | 0.141 ± 0.020  | -                                 | 0.006 ± 0.001 | -                                 | 0.032 ± 0.006         |
| <i>M/I/I(I)</i> | 0.131 ± 0.008     | 0.609 ± 0.040 | 0.092 ± 0.016                     | 0.650 ± 0.119  | 0.004 ± 0.001                     | 0.637 ± 0.040 | 0.035 ± 0.009                     |                       |
| <b>Cen-1</b>    | <i>M</i>          | 0.049 ± 0.006 | -                                 | 0.206 ± 0.020  | -                                 | 0.058 ± 0.002 | -                                 | 1.184 ± 0.078         |
|                 | <i>I</i>          | 0.032 ± 0.003 | 0.621 ± 0.051                     | 0.154 ± 0.013  | 0.746 ± 0.035                     | 0.034 ± 0.002 | 0.580 ± 0.080                     | 1.031 ± 0.054         |
|                 | <i>M/M</i>        | 0.041 ± 0.005 | -                                 | 0.141 ± 0.011  | -                                 | 0.030 ± 0.002 | -                                 | 0.894 ± 0.142         |
|                 | <i>I/I</i>        | 0.032 ± 0.002 | 0.832 ± 0.061                     | 0.104 ± 0.006  | 0.796 ± 0.043                     | 0.024 ± 0.003 | 0.810 ± 0.055                     | 0.868 ± 0.141         |
|                 | <i>M/M/M/M(M)</i> | 0.022 ± 0.001 | -                                 | 0.082 ± 0.006  | -                                 | 0.017 ± 0.002 | -                                 | 0.770 ± 0.042         |
|                 | <i>I/I/I(I)</i>   | 0.020 ± 0.001 | 0.930 ± 0.056                     | 0.070 ± 0.006  | 0.849 ± 0.74                      | 0.015 ± 0.002 | 0.923 ± 0.045                     | 0.769 ± 0.044         |
|                 | <i>M/I(M)</i>     | 0.050 ± 0.006 | -                                 | 0.158 ± 0.017  | -                                 | 0.034 ± 0.003 | -                                 | 0.682 ± 0.042         |
|                 | <i>M/I(I)</i>     | 0.020 ± 0.004 | 0.577 ± 0.062                     | 0.081 ± 0.007  | 0.480 ± 0.049                     | 0.018 ± 0.002 | 0.574 ± 0.084                     | 0.910 ± 0.044         |
|                 | <i>M/M/M/I(M)</i> | 0.028 ± 0.003 | -                                 | 0.083 ± 0.007  | -                                 | 0.016 ± 0.001 | -                                 | 1.211 ± 0.229         |
|                 | <i>M/M/M/I(I)</i> | 0.016 ± 0.004 | 0.566 ± 0.041                     | 0.045 ± 0.006  | 0.590 ± 0.048                     | 0.007 ± 0.002 | 0.469 ± 0.060                     | 0.671 ± 0.098         |
|                 | <i>M/M/I(M)</i>   | 0.036 ± 0.005 | -                                 | 0.131 ± 0.008  | -                                 | 0.023 ± 0.004 | -                                 | 0.767 ± 0.142         |
|                 | <i>M/M/I(I)</i>   | 0.018 ± 0.003 | 0.514 ± 0.058                     | 0.060 ± 0.004  | 0.455 ± 0.030                     | 0.012 ± 0.002 | 0.577 ± 0.073                     | 0.836 ± 0.113         |
|                 | <i>M/I/M(M)</i>   | 0.042 ± 0.005 | -                                 | 0.113 ± 0.006  | -                                 | 0.022 ± 0.002 | -                                 | 0.620 ± 0.104         |
|                 | <i>M/I/M/I(I)</i> | 0.014 ± 0.001 | 0.346 ± 0.028                     | 0.053 ± 0.006  | 0.424 ± 0.051                     | 0.010 ± 0.002 | 0.447 ± 0.089                     | 0.765 ± 0.143         |
|                 | <i>M/I/I(M)</i>   | 0.039 ± 0.002 | -                                 | 0.125 ± 0.008  | -                                 | 0.024 ± 0.003 | -                                 | 0.628 ± 0.088         |
| <i>M/I/I(I)</i> | 0.017 ± 0.002     | 0.406 ± 0.044 | 0.057 ± 0.005                     | 0.0460 ± 0.038 | 0.013 ± 0.001                     | 0.555 ± 0.058 | 1.151 ± 0.279                     |                       |

Data are mean value of each trait in each accession ± standard error.

***RW***: Rosette Weight; ***RW*/*RW<sub>m</sub>***: Rosette Weight ratio; ***IW***: Inflorescence Weight; ***IW*/*IW<sub>m</sub>***: Inflorescence Weight ratio; ***SW***: Seed Weight; ***SW*/*SW<sub>m</sub>***: Seed Weight ratio; ***SW*/*RW***: Seed Weight to Rosette Weight ratio.

Table S1. Continued...

| Accession | Treatment         | <i>RW</i>     | <i>RW/RW<sub>m</sub></i> | <i>IW</i>     | <i>IW/IW<sub>m</sub></i> | <i>SW</i>     | <i>V</i>      | <i>SW/RW</i>   |
|-----------|-------------------|---------------|--------------------------|---------------|--------------------------|---------------|---------------|----------------|
| Ler       |                   |               |                          |               |                          |               |               |                |
|           | <i>M</i>          | 0.028 ± 0.004 | -                        | 0.205 ± 0.005 | -                        | 0.146 ± 0.005 | -             | 5.207 ± 0.245  |
|           | <i>I</i>          | 0.014 ± 0.001 | 0.513 ± 0.048            | 0.139 ± 0.005 | 0.680 ± 0.026            | 0.056 ± 0.009 | 0.458 ± 0.056 | 3.878 ± 0.342  |
|           | <i>M/M</i>        | 0.012 ± 0.001 | -                        | 0.105 ± 0.002 | -                        | 0.069 ± 0.011 | -             | 6.093 ± 1.093  |
|           | <i>I/I</i>        | 0.009 ± 0.001 | 0.783 ± 0.036            | 0.076 ± 0.002 | 0.727 ± 0.019            | 0.046 ± 0.005 | 0.703 ± 0.080 | 4.945 ± 0.422  |
|           | <i>M/M/M/M(M)</i> | 0.004 ± 0.000 | -                        | 0.071 ± 0.002 | -                        | 0.043 ± 0.003 | -             | 8.412 ± 0.908  |
|           | <i>I/I/I(I)</i>   | 0.003 ± 0.000 | 0.822 ± 0.031            | 0.055 ± 0.001 | 0.781 ± 0.018            | 0.038 ± 0.006 | 0.885 ± 0.031 | 11.984 ± 1.463 |
|           | <i>M/I(M)</i>     | 0.014 ± 0.001 | -                        | 0.109 ± 0.005 | -                        | 0.059 ± 0.007 | -             | 4.116 ± 0.291  |
|           | <i>M/I(I)</i>     | 0.003 ± 0.000 | 0.202 ± 0.057            | 0.050 ± 0.002 | 0.490 ± 0.045            | 0.031 ± 0.005 | 0.528 ± 0.054 | 10.770 ± 0.690 |
|           | <i>M/M/M/I(M)</i> | 0.003 ± 0.000 | -                        | 0.081 ± 0.002 | -                        | 0.044 ± 0.003 | -             | 13.074 ± 0.985 |
|           | <i>M/M/M/I(I)</i> | 0.002 ± 0.000 | 0.558 ± 0.048            | 0.038 ± 0.002 | 0.473 ± 0.058            | 0.019 ± 0.004 | 0.426 ± 0.065 | 9.919 ± 1.069  |
|           | <i>M/M/I(I)</i>   | 0.005 ± 0.000 | -                        | 0.096 ± 0.003 | -                        | 0.058 ± 0.004 | -             | 12.380 ± 1.664 |
|           | <i>M/M/I(I)</i>   | 0.002 ± 0.000 | 0.435 ± 0.032            | 0.058 ± 0.002 | 0.604 ± 0.024            | 0.028 ± 0.005 | 0.528 ± 0.083 | 12.933 ± 2.223 |
|           | <i>M/I/M(I)</i>   | 0.006 ± 0.000 | -                        | 0.095 ± 0.004 | -                        | 0.062 ± 0.005 | -             | 10.461 ± 1.103 |
|           | <i>M/I/M/I(I)</i> | 0.003 ± 0.000 | 0.434 ± 0.006            | 0.050 ± 0.002 | 0.580 ± 0.019            | 0.029 ± 0.005 | 0.434 ± 0.082 | 10.588 ± 1.883 |
|           | <i>M/I/I(I)</i>   | 0.010 ± 0.001 | -                        | 0.086 ± 0.003 | -                        | 0.057 ± 0.004 | -             | 5.756 ± 0.465  |
|           | <i>M/I/I(I)</i>   | 0.004 ± 0.000 | 0.361 ± 0.011            | 0.052 ± 0.001 | 0.600 ± 0.014            | 0.030 ± 0.010 | 0.572 ± 0.175 | 8.447 ± 0.784  |

Data are mean value of each trait in each accession ± standard error.

***RW***: Rosette Weight; ***RW/RW<sub>m</sub>***: Rosette Weight ratio; ***IW***: Inflorescence Weight; ***IW/IW<sub>m</sub>***: Inflorescence Weight ratio; ***SW***: Seed Weight; ***SW/SW<sub>m</sub>***: Seed Weight ratio; ***SW/RW***: Seed Weight to Rosette Weight ratio.
