# Supplementary material for: Differential Tolerance to Direct and Indirect Density-Dependent Costs of Viral Infection in Arabidopsis thaliana
Source: PubMed Central journal article supplement (PMC2712083; doi:10.1371/journal.ppat.1000531), 2009-07-31
Supplement: ppat.1000531.s003.pdf [file ppat.1000531.s003.pdf]

**Table S2.** Two-way ANOVAs of *Arabidopsis* life-history traits in infected (I) and mock-inoculated (M) plants, by using “plant density” and “accession” as factors.

| Plant Condition               | Trait            | <i>n</i> | Plant Density |          |                    | Accession |          |                    | D x A     |          |                    |
|-------------------------------|------------------|----------|---------------|----------|--------------------|-----------|----------|--------------------|-----------|----------|--------------------|
|                               |                  |          | <i>df</i>     | <i>F</i> | <i>P</i>           | <i>df</i> | <i>F</i> | <i>P</i>           | <i>df</i> | <i>F</i> | <i>P</i>           |
| <b><i>Infected</i></b>        |                  |          |               |          |                    |           |          |                    |           |          |                    |
|                               | <b><i>RW</i></b> | 135      | 2             | 21.5     | 1x10 <sup>-5</sup> | 2         | 232.1    | 1x10 <sup>-5</sup> | 4         | 17.4     | 1x10 <sup>-5</sup> |
|                               | <b><i>IW</i></b> | 135      | 2             | 46.7     | 1x10 <sup>-5</sup> | 2         | 34.1     | 1x10 <sup>-5</sup> | 4         | 6.1      | 1x10 <sup>-5</sup> |
|                               | <b><i>SW</i></b> | 135      | 2             | 21.8     | 1x10 <sup>-5</sup> | 2         | 36.5     | 1x10 <sup>-5</sup> | 4         | 1.3      | 0.288              |
| <b><i>Mock-inoculated</i></b> |                  |          |               |          |                    |           |          |                    |           |          |                    |
|                               | <b><i>RW</i></b> | 135      | 2             | 41.9     | 1x10 <sup>-5</sup> | 2         | 267.9    | 1x10 <sup>-5</sup> | 4         | 29.1     | 1x10 <sup>-5</sup> |
|                               | <b><i>IW</i></b> | 135      | 2             | 37.7     | 1x10 <sup>-5</sup> | 2         | 13.2     | 1x10 <sup>-5</sup> | 4         | 19.8     | 1x10 <sup>-5</sup> |
|                               | <b><i>SW</i></b> | 135      | 2             | 120.6    | 1x10 <sup>-5</sup> | 2         | 154.8    | 1x10 <sup>-5</sup> | 4         | 1.02     | 0.401              |

Plant Condition (I or M) and traits (***RW***: Rosette Weight; ***IW***: Inflorescence Weight; ***SW***: Seed Weight) are listed on the left. ***n***: number of observations. ***df***: degrees of freedom. ***F***: *F*-value from the type III sum of squares ANOVA for each factor. ***P***: Estimated probability of obtaining this *F*-value under the null hypothesis.
