# Supplementary material for: Differential Tolerance to Direct and Indirect Density-Dependent Costs of Viral Infection in Arabidopsis thaliana
Source: PubMed Central journal article supplement (PMC2712083; doi:10.1371/journal.ppat.1000531), 2009-07-31
Supplement: ppat.1000531.s004.pdf [file ppat.1000531.s004.pdf]

**Table S3.** One-way ANOVAs of the impact of host plant density on *Arabidopsis* life-history traits in infected (I) and mock-inoculated (M) plants.

| Accession    | Trait            | <i>n</i> | Plant Density (I; I/I; I/I/I) |          |                    | Plant Density (M; M/M; M/M/M/M) |          |                    |
|--------------|------------------|----------|-------------------------------|----------|--------------------|---------------------------------|----------|--------------------|
|              |                  |          | <i>df</i>                     | <i>F</i> | <i>P</i>           | <i>df</i>                       | <i>F</i> | <i>P</i>           |
| <b>Boa-0</b> |                  |          |                               |          |                    |                                 |          |                    |
|              | <b><i>RW</i></b> | 45       | 2                             | 23.8     | 1x10 <sup>-5</sup> | 2                               | 40.1     | 1x10 <sup>-5</sup> |
|              | <b><i>IW</i></b> | 45       | 2                             | 21.6     | 1x10 <sup>-5</sup> | 2                               | 9.6      | 3x10 <sup>-4</sup> |
|              | <b><i>SW</i></b> | 45       | 2                             | 30.1     | 1x10 <sup>-5</sup> | 2                               | 15.1     | 1x10 <sup>-5</sup> |
| <b>Cen-1</b> |                  |          |                               |          |                    |                                 |          |                    |
|              | <b><i>RW</i></b> | 45       | 2                             | 7.6      | 0.002              | 2                               | 9.5      | 4x10 <sup>-4</sup> |
|              | <b><i>IW</i></b> | 45       | 2                             | 23.2     | 1x10 <sup>-5</sup> | 2                               | 19.7     | 1x10 <sup>-5</sup> |
|              | <b><i>SW</i></b> | 45       | 2                             | 12.7     | 1x10 <sup>-5</sup> | 2                               | 135.4    | 1x10 <sup>-5</sup> |
| <b>Ler</b>   |                  |          |                               |          |                    |                                 |          |                    |
|              | <b><i>RW</i></b> | 45       | 2                             | 39,2     | 1x10 <sup>-5</sup> | 2                               | 36.2     | 1x10 <sup>-5</sup> |
|              | <b><i>IW</i></b> | 45       | 2                             | 213.3    | 1x10 <sup>-5</sup> | 2                               | 646.7    | 1x10 <sup>-5</sup> |
|              | <b><i>SW</i></b> | 45       | 2                             | 17.4     | 1x10 <sup>-5</sup> | 2                               | 59.5     | 1x10 <sup>-5</sup> |

Accessions and traits (***RW***: Rosette Weight; ***IW***: Inflorescence Weight; ***SW***: Seed Weight) are listed on the left. ***n***: number of observations. ***df***: degrees of freedom. ***F***: *F*-value from the type III sum of squares ANOVA for each factor. ***P***: Estimated probability of obtaining this *F*-value under the null hypothesis.
