# Supplementary material for: Differential Tolerance to Direct and Indirect Density-Dependent Costs of Viral Infection in Arabidopsis thaliana
Source: PubMed Central journal article supplement (PMC2712083; doi:10.1371/journal.ppat.1000531), 2009-07-31
Supplement: ppat.1000531.s005.pdf [file ppat.1000531.s005.pdf]

**Table S4.** Three-way ANOVAs of life-history traits on *Arabidopsis* monocultures of infected (I) and mock-inoculated (M) plants, by using “plant condition (infected, I or mock-inoculated, M)”, “plant density” and “accession” as factors.

| Trait            | <i>n</i> | Plant condition |          |                    | Plant Density |          |                    | Accession |          |                    |
|------------------|----------|-----------------|----------|--------------------|---------------|----------|--------------------|-----------|----------|--------------------|
|                  |          | <i>df</i>       | <i>F</i> | <i>P</i>           | <i>df</i>     | <i>F</i> | <i>P</i>           | <i>df</i> | <i>F</i> | <i>P</i>           |
| <b><i>RW</i></b> | 290      | 1               | 16       | 1x10 <sup>-4</sup> | 2             | 63.06    | 1x10 <sup>-5</sup> | 2         | 498.34   | 1x10 <sup>-5</sup> |
| <b><i>IW</i></b> | 290      | 1               | 11.73    | 7x10 <sup>-4</sup> | 2             | 81.03    | 1x10 <sup>-5</sup> | 2         | 41.10    | 1x10 <sup>-5</sup> |
| <b><i>SW</i></b> | 290      | 1               | 75.54    | 1x10 <sup>-5</sup> | 2             | 126.11   | 1x10 <sup>-5</sup> | 2         | 174.77   | 1x10 <sup>-5</sup> |

  

| Trait            | <i>n</i> | C x D     |          |                    | C x A     |          |                    | D x A     |          |                    | C x D x A |          |                    |
|------------------|----------|-----------|----------|--------------------|-----------|----------|--------------------|-----------|----------|--------------------|-----------|----------|--------------------|
|                  |          | <i>df</i> | <i>F</i> | <i>P</i>           | <i>df</i> | <i>F</i> | <i>P</i>           | <i>df</i> | <i>F</i> | <i>P</i>           | <i>df</i> | <i>F</i> | <i>P</i>           |
| <b><i>RW</i></b> | 290      | 2         | 4.24     | 0.015              | 2         | 9.8      | 1x10 <sup>-4</sup> | 4         | 46.44    | 1x10 <sup>-5</sup> | 4         | 2.44     | 0.047              |
| <b><i>IW</i></b> | 290      | 2         | 0.65     | 0.524              | 2         | 0.34     | 0.712              | 4         | 4.99     | 7x10 <sup>-4</sup> | 4         | 0.72     | 0.576              |
| <b><i>SW</i></b> | 290      | 2         | 24.38    | 1x10 <sup>-5</sup> | 2         | 25.14    | 1x10 <sup>-5</sup> | 4         | 7.84     | 1x10 <sup>-5</sup> | 4         | 14.6     | 1x10 <sup>-5</sup> |

Traits (***RW***: Rosette Weight; ***IW***: Inflorescence Weight; ***SW***: Seed Weight) are listed on the left. ***n***: number of observations. ***df***: degrees of freedom. ***F***: *F*-value from the type III sum of squares ANOVA for each factor. ***P***: Estimated probability of obtaining this *F*-value under the null hypothesis.
