# Supplementary material for: Differential Tolerance to Direct and Indirect Density-Dependent Costs of Viral Infection in Arabidopsis thaliana
Source: PubMed Central journal article supplement (PMC2712083; doi:10.1371/journal.ppat.1000531), 2009-07-31
Supplement: ppat.1000531.s006.pdf [file ppat.1000531.s006.pdf]

**Table S5.** One-way ANOVAs of the direct cost of CMV infection on *Arabidopsis* life-history traits. Comparison between monocultures of infected and mock-inoculated plants at each plant density.

| Accession           | Trait            | 1 Plant  |           |          |                    | 2 Plants |           |          |                    | 4 Plants  |          |          |                    |
|---------------------|------------------|----------|-----------|----------|--------------------|----------|-----------|----------|--------------------|-----------|----------|----------|--------------------|
|                     |                  | <i>n</i> | <i>df</i> | <i>F</i> | <i>P</i>           | <i>n</i> | <i>df</i> | <i>F</i> | <i>P</i>           | <i>df</i> | <i>F</i> | <i>P</i> |                    |
| <b><i>Boa-0</i></b> |                  |          |           |          |                    |          |           |          |                    |           |          |          |                    |
|                     | <b><i>RW</i></b> | 30       | 1         | 8.85     | 0.005              | 30       | 1         | 8.20     | 0.007              | 30        | 1        | 7.93     | 0.008              |
|                     | <b><i>IW</i></b> | 30       | 1         | 0.04     | 0.841              | 30       | 1         | 0.30     | 0.619              | 30        | 1        | 7.4      | 0.010              |
|                     | <b><i>SW</i></b> | 30       | 1         | 0.03     | 0.873              | 30       | 1         | 5.01     | 0.032              | 30        | 1        | 8.2      | 0.007              |
| <b><i>Cen-1</i></b> |                  |          |           |          |                    |          |           |          |                    |           |          |          |                    |
|                     | <b><i>RW</i></b> | 30       | 1         | 5.54     | 0.026              | 30       | 1         | 4.81     | 0.043              | 30        | 1        | 8.82     | 0.006              |
|                     | <b><i>IW</i></b> | 30       | 1         | 4.46     | 0.041              | 30       | 1         | 7.29     | 0.012              | 30        | 1        | 9.06     | 0.004              |
|                     | <b><i>SW</i></b> | 30       | 1         | 69.57    | 1x10 <sup>-5</sup> | 30       | 1         | 5.13     | 0.036              | 30        | 1        | 5.24     | 0.031              |
| <b><i>Ler</i></b>   |                  |          |           |          |                    |          |           |          |                    |           |          |          |                    |
|                     | <b><i>RW</i></b> | 30       | 1         | 12.48    | 0.001              | 30       | 1         | 4.37     | 0.046              | 30        | 1        | 18.51    | 2x10 <sup>-4</sup> |
|                     | <b><i>IW</i></b> | 30       | 1         | 138.1    | 1x10 <sup>-5</sup> | 30       | 1         | 98.96    | 1x10 <sup>-5</sup> | 30        | 1        | 53.43    | 1x10 <sup>-5</sup> |
|                     | <b><i>SW</i></b> | 30       | 1         | 80.25    | 1x10 <sup>-5</sup> | 30       | 1         | 5.57     | 0.029              | 30        | 1        | 4.78     | 0.045              |

Accessions and traits (***RW***: Rosette Weight; ***IW***: Inflorescence Weight; ***SW***: Seed Weight) are listed on the left. ***n***: number of observations. ***df***: degrees of freedom. ***F***: *F*-value from the type III sum of squares ANOVA for each factor. ***P***: Estimated probability of obtaining this *F*-value under the null hypothesis.
