# Supplementary material for: Differential Tolerance to Direct and Indirect Density-Dependent Costs of Viral Infection in Arabidopsis thaliana
Source: PubMed Central journal article supplement (PMC2712083; doi:10.1371/journal.ppat.1000531), 2009-07-31
Supplement: ppat.1000531.s007.pdf [file ppat.1000531.s007.pdf]

**Table S6.** Two-way ANOVAs of the direct cost of CMV infection ( $Trait_i/Trait_m$ ) on *Arabidopsis* life-history traits, by using “plant density” and “accession” as factors.

| Trait       | <i>n</i> | Plant Density |          |                    | Accession |          |          | D x A     |          |                    |
|-------------|----------|---------------|----------|--------------------|-----------|----------|----------|-----------|----------|--------------------|
|             |          | <i>df</i>     | <i>F</i> | <i>P</i>           | <i>df</i> | <i>F</i> | <i>P</i> | <i>df</i> | <i>F</i> | <i>P</i>           |
| $RW_i/RW_m$ | 135      | 2             | 13.62    | $1 \times 10^{-5}$ | 2         | 1.85     | 0.161    | 4         | 1.22     | 0.307              |
| $IW_i/IW_m$ | 135      | 2             | 4.02     | 0.031              | 2         | 2.63     | 0.076    | 4         | 2.11     | 0.083              |
| $SW_i/SW_m$ | 135      | 2             | 4.88     | 0.019              | 2         | 4.13     | 0.026    | 4         | 7.94     | $1 \times 10^{-5}$ |

Traits ( $RW_i/RW_m$ : Effect of CMV infection in Rosette Weight;  $IW_i/IW_m$ : Effect of CMV infection in Inflorescence Weight;  $SW_i/SW_m$ : Effect of infection in Seed Weight) are listed on the left. *n*: number of observations. *df*: degrees of freedom. *F*: *F*-value from the type III sum of squares ANOVA for each factor. *P*: Estimated probability of obtaining this *F*-value under the null hypothesis.
