# Supplementary material for: Differential Tolerance to Direct and Indirect Density-Dependent Costs of Viral Infection in Arabidopsis thaliana
Source: PubMed Central journal article supplement (PMC2712083; doi:10.1371/journal.ppat.1000531), 2009-07-31
Supplement: ppat.1000531.s008.pdf [file ppat.1000531.s008.pdf]

**Table S7.** One-way ANOVAs of the impact of host plant density and the direct cost of CMV infection ( $Trait_i/Trait_m$ ) on *Arabidopsis* life-history traits.

| Accession    | Trait       | Plant Density |           |          |                    |
|--------------|-------------|---------------|-----------|----------|--------------------|
|              |             | <i>n</i>      | <i>df</i> | <i>F</i> | <i>P</i>           |
| <b>Boa-0</b> |             |               |           |          |                    |
|              | $RW_i/RW_m$ | 45            | 2         | 2.33     | 0.108              |
|              | $IW_i/IW_m$ | 45            | 2         | 1.48     | 0.237              |
|              | $SW_i/SW_m$ | 45            | 2         | 6.89     | 0.002              |
| <b>Cen-1</b> |             |               |           |          |                    |
|              | $RW_i/RW_m$ | 45            | 2         | 7.61     | 0.015              |
|              | $IW_i/IW_m$ | 45            | 2         | 1.08     | 0.348              |
|              | $SW_i/SW_m$ | 45            | 2         | 4.88     | 0.027              |
| <b>Ler</b>   |             |               |           |          |                    |
|              | $RW_i/RW_m$ | 45            | 2         | 11.53    | $1 \times 10^{-4}$ |
|              | $IW_i/IW_m$ | 45            | 2         | 213.28   | $1 \times 10^{-5}$ |
|              | $SW_i/SW_m$ | 45            | 2         | 6.61     | 0.003              |

Accessions and traits ( $RW_i/RW_m$ : Effect of CMV infection in Rosette Weight;  $IW_i/IW_m$ : Effect of CMV infection in Inflorescence Weight;  $SW_i/SW_m$ : Effect of infection in Seed Weight) are listed on the left. ***n***: number of observations. ***df***: degrees of freedom. ***F***: *F*-value from the type III sum of squares ANOVA for each factor. ***P***: Estimated probability of obtaining this *F*-value under the null hypothesis.
