# Supplementary material for: Differential Tolerance to Direct and Indirect Density-Dependent Costs of Viral Infection in Arabidopsis thaliana
Source: PubMed Central journal article supplement (PMC2712083; doi:10.1371/journal.ppat.1000531), 2009-07-31
Supplement: ppat.1000531.s009.pdf [file ppat.1000531.s009.pdf]

**Table S8.** Three-way ANOVAs for the indirect cost of CMV infection in *Arabidopsis* life-history traits in infected and mock-inoculated plants, by using “class of competition”, “plant density” and “accession” as factors.

| Plant Condition        | Trait            | <i>n</i> | Class of competition |          |                    | Plant Density |          |                    | Accession |          |                    |
|------------------------|------------------|----------|----------------------|----------|--------------------|---------------|----------|--------------------|-----------|----------|--------------------|
|                        |                  |          | <i>df</i>            | <i>F</i> | <i>P</i>           | <i>df</i>     | <i>F</i> | <i>P</i>           | <i>df</i> | <i>F</i> | <i>P</i>           |
| <b>Infected</b>        |                  |          |                      |          |                    |               |          |                    |           |          |                    |
|                        | <b><i>RW</i></b> | 315      | 1                    | 14.92    | 1x10 <sup>-4</sup> | 1             | 11.42    | 8x10 <sup>-4</sup> | 2         | 570.45   | 1x10 <sup>-5</sup> |
|                        | <b><i>IW</i></b> | 315      | 1                    | 14.05    | 2x10 <sup>-4</sup> | 1             | 23.03    | 1x10 <sup>-5</sup> | 2         | 32.80    | 1x10 <sup>-5</sup> |
|                        | <b><i>SW</i></b> | 315      | 1                    | 11.08    | 0.001              | 1             | 19.22    | 1x10 <sup>-5</sup> | 2         | 68.83    | 1x10 <sup>-5</sup> |
| <b>Mock-inoculated</b> |                  |          |                      |          |                    |               |          |                    |           |          |                    |
|                        | <b><i>RW</i></b> | 315      | 1                    | 0.73     | 0.395              | 1             | 28.21    | 1x10 <sup>-5</sup> | 2         | 514.57   | 1x10 <sup>-5</sup> |
|                        | <b><i>IW</i></b> | 315      | 1                    | 1.69     | 0.195              | 1             | 41.23    | 1x10 <sup>-5</sup> | 2         | 25.65    | 1x10 <sup>-5</sup> |
|                        | <b><i>SW</i></b> | 315      | 1                    | 0.44     | 0.509              | 1             | 49.24    | 1x10 <sup>-5</sup> | 2         | 166.09   | 1x10 <sup>-5</sup> |

  

| Plant Condition        | Trait            | <i>N</i> | Cs x D    |          |          | Cs x A    |          |          | D x A     |          |                    | Cs x D x A |          |          |
|------------------------|------------------|----------|-----------|----------|----------|-----------|----------|----------|-----------|----------|--------------------|------------|----------|----------|
|                        |                  |          | <i>df</i> | <i>F</i> | <i>P</i> | <i>df</i> | <i>F</i> | <i>P</i> | <i>df</i> | <i>F</i> | <i>P</i>           | <i>df</i>  | <i>F</i> | <i>P</i> |
| <b>Infected</b>        |                  |          |           |          |          |           |          |          |           |          |                    |            |          |          |
|                        | <b><i>RW</i></b> | 315      | 1         | 3.00     | 0.084    | 2         | 6.44     | 0.002    | 2         | 2.82     | 0.069              | 2          | 0.88     | 0.416    |
|                        | <b><i>IW</i></b> | 315      | 1         | 4.98     | 0.026    | 2         | 0.77     | 0.462    | 2         | 2.67     | 0.071              | 2          | 1.39     | 0.250    |
|                        | <b><i>SW</i></b> | 315      | 1         | 0.07     | 0.789    | 2         | 4.20     | 0.016    | 2         | 0.32     | 0.730              | 2          | 0.08     | 0.925    |
| <b>Mock-inoculated</b> |                  |          |           |          |          |           |          |          |           |          |                    |            |          |          |
|                        | <b><i>RW</i></b> | 315      | 1         | 2.02     | 0.156    | 2         | 0.38     | 0.682    | 2         | 10.79    | 1x10 <sup>-5</sup> | 2          | 1.64     | 0.195    |
|                        | <b><i>IW</i></b> | 315      | 1         | 0.07     | 0.788    | 2         | 1.81     | 0.166    | 2         | 1.55     | 0.214              | 2          | 0.80     | 0.450    |
|                        | <b><i>SW</i></b> | 315      | 1         | 1.64     | 0.201    | 2         | 0.92     | 0.401    | 2         | 0.03     | 0.971              | 2          | 1.61     | 0.281    |

Plant condition (I or M) and traits (***RW***: Rosette Weight; ***IW***: Inflorescence Weight; ***SW***: Seed Weight) are listed on the left. Classes of competition are **IntraClass**: I, I/I, I/I/I/I and M, M/M, M/M/M/M; or **InterClass**: M/M/M/I, M/M/I/I, M/I/M/I, M/I/I/I. ***n***: number of observations. ***df***: degrees of freedom. ***F***: *F*-value from the type III sum of squares ANOVA for each factor. ***P***: Estimated probability of obtaining this *F*-value under the null hypothesis.
