# Supplementary material for: Differential Tolerance to Direct and Indirect Density-Dependent Costs of Viral Infection in Arabidopsis thaliana
Source: PubMed Central journal article supplement (PMC2712083; doi:10.1371/journal.ppat.1000531), 2009-07-31
Supplement: ppat.1000531.s010.pdf [file ppat.1000531.s010.pdf]

**Table S9.** One-way ANOVAs for the indirect cost of CMV infection on *Arabidopsis* life-history traits in infected and mock-inoculated plants. Comparison between intra and interclass treatments at each plant density.

| Accession    | Plant Condition               | Trait            | Plant Density |          |          |                    |          |           |          |                    |
|--------------|-------------------------------|------------------|---------------|----------|----------|--------------------|----------|-----------|----------|--------------------|
|              |                               |                  | 2 Plants      |          |          |                    | 4 Plants |           |          |                    |
|              |                               |                  | <i>df</i>     | <i>n</i> | <i>F</i> | <i>P</i>           | <i>n</i> | <i>df</i> | <i>F</i> | <i>P</i>           |
| <b>Boa-0</b> |                               |                  |               |          |          |                    |          |           |          |                    |
|              | <b><i>Infected</i></b>        |                  |               |          |          |                    |          |           |          |                    |
|              |                               | <b><i>RW</i></b> | 1             | 30       | 5.98     | 0.020              | 75       | 4         | 1.50     | 0.210              |
|              |                               | <b><i>IW</i></b> | 1             | 30       | 4.64     | 0.045              | 75       | 4         | 0.15     | 0.963              |
|              |                               | <b><i>SW</i></b> | 1             | 30       | 0.02     | 0.889              | 75       | 4         | 1.11     | 0.360              |
|              | <b><i>Mock-inoculated</i></b> |                  |               |          |          |                    |          |           |          |                    |
|              |                               | <b><i>RW</i></b> | 1             | 30       | 0.88     | 0.353              | 75       | 4         | 1.17     | 0.329              |
|              |                               | <b><i>IW</i></b> | 1             | 30       | 0.01     | 0.932              | 75       | 4         | 0.84     | 0.503              |
|              |                               | <b><i>SW</i></b> | 1             | 30       | 0.09     | 0.762              | 75       | 4         | 2.99     | 0.024              |
| <b>Cen-1</b> |                               |                  |               |          |          |                    |          |           |          |                    |
|              | <b><i>Infected</i></b>        |                  |               |          |          |                    |          |           |          |                    |
|              |                               | <b><i>RW</i></b> | 1             | 30       | 6.97     | 0.013              | 75       | 4         | 0.83     | 0.512              |
|              |                               | <b><i>IW</i></b> | 1             | 30       | 5.64     | 0.025              | 75       | 4         | 3.43     | 0.015              |
|              |                               | <b><i>SW</i></b> | 1             | 30       | 8.13     | 0.008              | 75       | 4         | 3.10     | 0.021              |
|              | <b><i>Mock-inoculated</i></b> |                  |               |          |          |                    |          |           |          |                    |
|              |                               | <b><i>RW</i></b> | 1             | 30       | 1.51     | 0.230              | 75       | 4         | 5.50     | 7x10 <sup>-4</sup> |
|              |                               | <b><i>IW</i></b> | 1             | 30       | 0.67     | 0.419              | 75       | 4         | 11.28    | 1x10 <sup>-5</sup> |
|              |                               | <b><i>SW</i></b> | 1             | 30       | 1.32     | 0.261              | 75       | 4         | 2.80     | 0.033              |
| <b>Ler</b>   |                               |                  |               |          |          |                    |          |           |          |                    |
|              | <b><i>Infected</i></b>        |                  |               |          |          |                    |          |           |          |                    |
|              |                               | <b><i>RW</i></b> | 1             | 30       | 65.20    | 1x10 <sup>-5</sup> | 75       | 4         | 1.18     | 0.327              |
|              |                               | <b><i>IW</i></b> | 1             | 30       | 92.65    | 1x10 <sup>-5</sup> | 75       | 4         | 20.26    | 1x10 <sup>-5</sup> |
|              |                               | <b><i>SW</i></b> | 1             | 30       | 4.64     | 0.047              | 75       | 4         | 37.53    | 1x10 <sup>-5</sup> |
|              | <b><i>Mock-inoculated</i></b> |                  |               |          |          |                    |          |           |          |                    |
|              |                               | <b><i>RW</i></b> | 1             | 30       | 2.51     | 0.124              | 75       | 4         | 60.33    | 1x10 <sup>-5</sup> |
|              |                               | <b><i>IW</i></b> | 1             | 30       | 0.14     | 0.707              | 75       | 4         | 11.71    | 1x10 <sup>-5</sup> |
|              |                               | <b><i>SW</i></b> | 1             | 30       | 0.51     | 0.479              | 75       | 4         | 5.02     | 0.001              |

Accessions, plant condition (I or M) and traits (***RW***: Rosette Weight; ***IW***: Inflorescence Weight; ***SW***: Seed Weight) are listed on the left. ***n***: number of observations. ***df***: degrees of freedom. ***F***: *F*-value from the type III sum of squares ANOVA for each factor. ***P***: Estimated probability of obtaining this *F*-value under the null hypothesis.
