# Supplementary material for: Differential Tolerance to Direct and Indirect Density-Dependent Costs of Viral Infection in Arabidopsis thaliana
Source: PubMed Central journal article supplement (PMC2712083; doi:10.1371/journal.ppat.1000531), 2009-07-31
Supplement: ppat.1000531.s011.pdf [file ppat.1000531.s011.pdf]

**Table S10.** Three-way ANOVAs of the effect of CMV infection ( $Trait_i/Trait_m$ ) on *Arabidopsis* life-history traits, by using “class of competition”, “plant density” and “accession” as factors.

| Trait                                       | <i>n</i> | Class of competition |          |                    | Plant Density |          |                    | Accession |          |                    |
|---------------------------------------------|----------|----------------------|----------|--------------------|---------------|----------|--------------------|-----------|----------|--------------------|
|                                             |          | <i>df</i>            | <i>F</i> | <i>P</i>           | <i>df</i>     | <i>F</i> | <i>P</i>           | <i>df</i> | <i>F</i> | <i>P</i>           |
| <b><i>RW<sub>i</sub>/RW<sub>m</sub></i></b> | 315      | 1                    | 131.02   | 1x10 <sup>-5</sup> | 1             | 13.30    | 3x10 <sup>-4</sup> | 2         | 9.80     | 1x10 <sup>-4</sup> |
| <b><i>IW<sub>i</sub>/IW<sub>m</sub></i></b> | 315      | 1                    | 27.29    | 1x10 <sup>-5</sup> | 1             | 0.52     | 0.470              | 2         | 3.33     | 0.037              |
| <b><i>SW<sub>i</sub>/SW<sub>m</sub></i></b> | 315      | 1                    | 7.97     | 0.005              | 1             | 0.04     | 0.836              | 2         | 5.43     | 0.018              |

  

| Trait                                       | <i>n</i> | Cs x D    |          |          | Cs x A    |          |                    | D x A     |          |          | Cs x D x A |          |          |
|---------------------------------------------|----------|-----------|----------|----------|-----------|----------|--------------------|-----------|----------|----------|------------|----------|----------|
|                                             |          | <i>df</i> | <i>F</i> | <i>P</i> | <i>df</i> | <i>F</i> | <i>P</i>           | <i>df</i> | <i>F</i> | <i>P</i> | <i>df</i>  | <i>F</i> | <i>P</i> |
| <b><i>RW<sub>i</sub>/RW<sub>m</sub></i></b> | 315      | 1         | 0.11     | 0.745    | 2         | 9.40     | 1x10 <sup>-4</sup> | 2         | 0.07     | 0.935    | 2          | 6.76     | 0.005    |
| <b><i>IW<sub>i</sub>/IW<sub>m</sub></i></b> | 315      | 1         | 1.15     | 0.284    | 2         | 3.27     | 0.033              | 2         | 0.44     | 0.645    | 2          | 3.81     | 0.023    |
| <b><i>SW<sub>i</sub>/SW<sub>m</sub></i></b> | 315      | 1         | 0.09     | 0.767    | 2         | 7.43     | 7x10 <sup>-4</sup> | 2         | 0.61     | 0.545    | 2          | 2.93     | 0.049    |

Traits (***RW<sub>i</sub>/RW<sub>m</sub>***: Effect of CMV infection in Rosette Weight; ***IW<sub>i</sub>/IW<sub>m</sub>***: Effect of CMV infection in Inflorescence Weight; ***SW<sub>i</sub>/SW<sub>m</sub>***: Effect of infection in Seed Weight) are listed on the left. Classes of competition are **IntraClass**: I, I/I, I/I/I and M, M/M, M/M/M/M; or **InterClass**: M/M/M/I, M/M/I/I, M/I/M/I, M/I/I/I. ***n***: number of observations. ***df***: degrees of freedom. ***F***: *F*-value from the type III sum of squares ANOVA for each factor. ***P***: Estimated probability of obtaining this *F*-value under the null hypothesis.
