# Supplementary material for: Differential Tolerance to Direct and Indirect Density-Dependent Costs of Viral Infection in Arabidopsis thaliana
Source: PubMed Central journal article supplement (PMC2712083; doi:10.1371/journal.ppat.1000531), 2009-07-31
Supplement: ppat.1000531.s012.pdf [file ppat.1000531.s012.pdf]

**Table S11.** One-way ANOVAs of the effect of CMV infection ( $Trait_i / Trait_m$ ) on *Arabidopsis* life-history traits. Comparison between intra and interclass treatments at each plant density.

| Accession    | Trait       | Plant Density |           |          |                    |          |           |          |                    |
|--------------|-------------|---------------|-----------|----------|--------------------|----------|-----------|----------|--------------------|
|              |             | 2 Plants      |           |          |                    | 4 Plants |           |          |                    |
|              |             | <i>n</i>      | <i>df</i> | <i>F</i> | <i>P</i>           | <i>n</i> | <i>df</i> | <i>F</i> | <i>P</i>           |
| <b>Boa-0</b> |             |               |           |          |                    |          |           |          |                    |
|              | $RW_i/RW_m$ | 30            | 1         | 3.93     | 0.043              | 75       | 1         | 10.72    | 0.002              |
|              | $IW_i/IW_m$ | 30            | 1         | 4.88     | 0.037              | 75       | 1         | 0.25     | 0.619              |
|              | $SW_i/SW_m$ | 30            | 1         | 0.01     | 0.931              | 75       | 1         | 9.52     | 0.004              |
| <b>Cen-1</b> |             |               |           |          |                    |          |           |          |                    |
|              | $RW_i/RW_m$ | 30            | 1         | 15.91    | $4 \times 10^{-4}$ | 75       | 1         | 26.22    | $1 \times 10^{-5}$ |
|              | $IW_i/IW_m$ | 30            | 1         | 12.27    | 0.002              | 75       | 1         | 35.86    | $1 \times 10^{-5}$ |
|              | $SW_i/SW_m$ | 30            | 1         | 6.55     | 0.022              | 75       | 1         | 16.08    | $1 \times 10^{-4}$ |
| <b>Ler</b>   |             |               |           |          |                    |          |           |          |                    |
|              | $RW_i/RW_m$ | 30            | 1         | 78.05    | $1 \times 10^{-5}$ | 75       | 1         | 13.82    | $4 \times 10^{-4}$ |
|              | $IW_i/IW_m$ | 30            | 1         | 100.62   | $1 \times 10^{-5}$ | 75       | 1         | 80.66    | $1 \times 10^{-5}$ |
|              | $SW_i/SW_m$ | 30            | 1         | 6.36     | 0.023              | 75       | 1         | 9.67     | 0.003              |

Accessions and traits ( $RW_i/RW_m$ : Effect of CMV infection in Rosette Weight;  $IW_i/IW_m$ : Effect of CMV infection in Inflorescence Weight;  $SW_i/SW_m$ : Effect of infection in Seed Weight) are listed on the left. *n*: number of observations. *df*: degrees of freedom. *F*: *F*-value from the type III sum of squares ANOVA for each factor. *P*: Estimated probability of obtaining this *F*-value under the null hypothesis.
