# Supplementary material for: Differential Tolerance to Direct and Indirect Density-Dependent Costs of Viral Infection in Arabidopsis thaliana
Source: PubMed Central journal article supplement (PMC2712083; doi:10.1371/journal.ppat.1000531), 2009-07-31
Supplement: ppat.1000531.s014.pdf [file ppat.1000531.s014.pdf]

**Table S13.** One-way ANOVAs of the impact of host plant density in the indirect cost of CMV infection [ $(\text{Trait}/\text{Trait}_m)_{\text{Inter-class}}/(\text{Trait}/\text{Trait}_m)_{\text{Intra-class}}$ ] on *Arabidopsis* life-history traits.

| Accession           | Trait                  | Plant Density |           |          |                    |
|---------------------|------------------------|---------------|-----------|----------|--------------------|
|                     |                        | <i>n</i>      | <i>df</i> | <i>F</i> | <i>P</i>           |
| <b><i>Boa-0</i></b> |                        |               |           |          |                    |
|                     | <b>Ratio <i>RW</i></b> | 75            | 1         | 0.78     | 0.379              |
|                     | <b>Ratio <i>IW</i></b> | 75            | 1         | 7.06     | 0.009              |
|                     | <b>Ratio <i>SW</i></b> | 75            | 1         | 4.33     | 0.041              |
| <b><i>Cen-1</i></b> |                        |               |           |          |                    |
|                     | <b>Ratio <i>RW</i></b> | 75            | 1         | 4.18     | 0.040              |
|                     | <b>Ratio <i>IW</i></b> | 75            | 1         | 0.01     | 0.924              |
|                     | <b>Ratio <i>SW</i></b> | 75            | 1         | 6.15     | 0.025              |
| <b><i>Ler</i></b>   |                        |               |           |          |                    |
|                     | <b>Ratio <i>RW</i></b> | 75            | 1         | 55.57    | 1x10 <sup>-5</sup> |
|                     | <b>Ratio <i>IW</i></b> | 75            | 1         | 2.39     | 0.127              |
|                     | <b>Ratio <i>SW</i></b> | 75            | 1         | 4.17     | 0.039              |

Accessions and traits (**Ratio *RW***:  $(RW/RW_m)_{\text{Inter-class}}/(RW/RW_m)_{\text{Intra-class}}$ ; **Ratio *IW***:  $(IW/IW_m)_{\text{Inter-class}}/(IW/IW_m)_{\text{Intra-class}}$ ; **Ratio *SW***:  $(SW/SW_m)_{\text{Inter-class}}/(SW/SW_m)_{\text{Intra-class}}$ ) are listed on the left. ***n***: number of observations. ***df***: degrees of freedom. ***F***: *F*-value from the type III sum of squares ANOVA for each factor. ***P***: Estimated probability of obtaining this *F*-value under the null hypothesis.
