# Supplementary material for: Differential Tolerance to Direct and Indirect Density-Dependent Costs of Viral Infection in Arabidopsis thaliana
Source: PubMed Central journal article supplement (PMC2712083; doi:10.1371/journal.ppat.1000531), 2009-07-31
Supplement: ppat.1000531.s015.pdf [file ppat.1000531.s015.pdf]

**Table S14.** Two-way ANOVAs of the impact of CMV prevalence at 4 plants per pot in the effect of CMV infection ( $Trait_i/Trait_m$ ) on *Arabidopsis* life-history traits, by using “prevalence” and “accession” as factors.

| Trait                                       | Prevalence |           |          |                    | Accession |          |                    | P x A     |          |          |
|---------------------------------------------|------------|-----------|----------|--------------------|-----------|----------|--------------------|-----------|----------|----------|
|                                             | <i>n</i>   | <i>df</i> | <i>F</i> | <i>P</i>           | <i>df</i> | <i>F</i> | <i>P</i>           | <i>df</i> | <i>F</i> | <i>P</i> |
| <b><i>RW<sub>i</sub>/RW<sub>m</sub></i></b> | 225        | 4         | 21.97    | 1×10 <sup>-5</sup> | 2         | 15.24    | 1×10 <sup>-5</sup> | 8         | 2.12     | 0.045    |
| <b><i>IW<sub>i</sub>/IW<sub>m</sub></i></b> | 225        | 4         | 3.14     | 0.016              | 2         | 8.94     | 2×10 <sup>-4</sup> | 8         | 2.15     | 0.033    |
| <b><i>SW<sub>i</sub>/SW<sub>m</sub></i></b> | 225        | 4         | 1.57     | 0.184              | 2         | 1.36     | 0.259              | 8         | 2.48     | 0.014    |

Traits (***RW<sub>i</sub>/RW<sub>m</sub>***: Effect of CMV infection in Rosette Weight; ***IW<sub>i</sub>/IW<sub>m</sub>***: Effect of CMV infection in Inflorescence Weight; ***SW<sub>i</sub>/SW<sub>m</sub>***: Effect of infection in Seed Weight) are listed on the left. ***n***: number of observations. ***df***: degrees of freedom. ***F***: *F*-value from the type III sum of squares ANOVA for each factor. ***P***: Estimated probability of obtaining this *F*-value under the null hypothesis.
