# Supplementary material for: Differential Tolerance to Direct and Indirect Density-Dependent Costs of Viral Infection in Arabidopsis thaliana
Source: PubMed Central journal article supplement (PMC2712083; doi:10.1371/journal.ppat.1000531), 2009-07-31
Supplement: ppat.1000531.s016.pdf [file ppat.1000531.s016.pdf]

**Table S15.** One-way ANOVAs of the impact of CMV prevalence at 4 plants per pot in the effect of CMV infection ( $Trait_i/Trait_m$ ) on *Arabidopsis* life-history traits.

| Accession           | Trait       | Prevalence |           |          |                    |
|---------------------|-------------|------------|-----------|----------|--------------------|
|                     |             | <i>n</i>   | <i>df</i> | <i>F</i> | <i>P</i>           |
| <b><i>Boa-0</i></b> |             |            |           |          |                    |
|                     | $RW_i/RW_m$ | 75         | 4         | 0.46     | 0.762              |
|                     | $IW_i/IW_m$ | 75         | 4         | 2.17     | 0.113              |
|                     | $SW_i/SW_m$ | 75         | 4         | 4.17     | 0.004              |
| <b><i>Cen-1</i></b> |             |            |           |          |                    |
|                     | $RW_i/RW_m$ | 75         | 4         | 7.63     | $1 \times 10^{-5}$ |
|                     | $IW_i/IW_m$ | 75         | 4         | 9.24     | $1 \times 10^{-5}$ |
|                     | $SW_i/SW_m$ | 75         | 4         | 1.08     | 0.734              |
| <b><i>Ler</i></b>   |             |            |           |          |                    |
|                     | $RW_i/RW_m$ | 75         | 4         | 42.21    | $1 \times 10^{-5}$ |
|                     | $IW_i/IW_m$ | 75         | 4         | 20.26    | $1 \times 10^{-5}$ |
|                     | $SW_i/SW_m$ | 75         | 4         | 2.43     | 0.056              |

Accessions and traits ( $RW_i/RW_m$ : Effect of CMV infection in Rosette Weight;  $IW_i/IW_m$ : Effect of CMV infection in Inflorescence Weight;  $SW_i/SW_m$ : Effect of infection in Seed Weight) are listed on the left. ***n***: number of observations. ***df***: degrees of freedom. ***F***: *F*-value from the type III sum of squares ANOVA for each factor. ***P***: Estimated probability of obtaining this *F*-value under the null hypothesis.
