# Supplementary material for: Differential Tolerance to Direct and Indirect Density-Dependent Costs of Viral Infection in Arabidopsis thaliana
Source: PubMed Central journal article supplement (PMC2712083; doi:10.1371/journal.ppat.1000531), 2009-07-31
Supplement: ppat.1000531.s017.pdf [file ppat.1000531.s017.pdf]

**Table S16.** Three-way ANOVAs of *SW/RW* ratio, by using “plant condition (infected, I or mock-inoculated, M)”, “plant density” and “accession” as factors.

| Trait               | <i>n</i> | Plant condition |          |          | Plant Density |          |                    | Accession |          |                    |
|---------------------|----------|-----------------|----------|----------|---------------|----------|--------------------|-----------|----------|--------------------|
|                     |          | <i>df</i>       | <i>F</i> | <i>P</i> | <i>df</i>     | <i>F</i> | <i>P</i>           | <i>df</i> | <i>F</i> | <i>P</i>           |
| <b><i>SW/RW</i></b> | 720      | 1               | 3.92     | 0.045    | 2             | 8.71     | 2x10 <sup>-4</sup> | 2         | 196.46   | 1x10 <sup>-5</sup> |

  

| Trait              | <i>n</i> | C x D     |          |          | C x A     |          |          | D x A     |          |                    | C x D x A |          |          |
|--------------------|----------|-----------|----------|----------|-----------|----------|----------|-----------|----------|--------------------|-----------|----------|----------|
|                    |          | <i>df</i> | <i>F</i> | <i>P</i> | <i>df</i> | <i>F</i> | <i>P</i> | <i>df</i> | <i>F</i> | <i>P</i>           | <i>df</i> | <i>F</i> | <i>P</i> |
| <b><i>SWRW</i></b> | 720      | 2         | 3.32     | 0.039    | 2         | 0.07     | 0.934    | 4         | 13.71    | 1x10 <sup>-5</sup> | 4         | 1.12     | 0.344    |

Traits (***SW/RW***: Seed Weight to Rosette Weight ratio) are listed on the left. ***n***: number of observations. ***df***: degrees of freedom. ***F***: *F*-value from the type III sum of squares ANOVA for each factor. ***P***: Estimated probability of obtaining this *F*-value under the null hypothesis.
