# Supplementary material for: Differential Tolerance to Direct and Indirect Density-Dependent Costs of Viral Infection in Arabidopsis thaliana
Source: PubMed Central journal article supplement (PMC2712083; doi:10.1371/journal.ppat.1000531), 2009-07-31
Supplement: ppat.1000531.s018.pdf [file ppat.1000531.s018.pdf]

**Table S17.** One-way ANOVAs of *SW/RW* ratio in *Arabidopsis* accessions. Comparison between infected (I) and mock-inoculated (M) plants at each plant density.

| N° Plants       | Treatment      | Boa-0    |           |          |                    | Cen-1    |           |          |                    | Ler      |           |          |                    |
|-----------------|----------------|----------|-----------|----------|--------------------|----------|-----------|----------|--------------------|----------|-----------|----------|--------------------|
|                 |                | <i>n</i> | <i>df</i> | <i>F</i> | <i>P</i>           | <i>n</i> | <i>df</i> | <i>F</i> | <i>P</i>           | <i>n</i> | <i>df</i> | <i>F</i> | <i>P</i>           |
| <b>1 Plant</b>  |                |          |           |          |                    |          |           |          |                    |          |           |          |                    |
|                 | <i>I</i>       | 30       | 1         | 12.87    | 1x10 <sup>-5</sup> | 30       | 1         | 6.96     | 1x10 <sup>-3</sup> | 30       | 1         | 14.39    | 1x10 <sup>-5</sup> |
| <b>2 Plants</b> |                |          |           |          |                    |          |           |          |                    |          |           |          |                    |
|                 | <i>M/I</i>     | 30       | 1         | 1.59     | 0.216              | 30       | 1         | 6.46     | 0.015              | 30       | 1         | 5.97     | 0.021              |
|                 | <i>I/I</i>     | 30       | 1         | 0.16     | 0.696              | 30       | 1         | 0.02     | 0.897              | 30       | 1         | 1.32     | 0.260              |
| <b>4 Plants</b> |                |          |           |          |                    |          |           |          |                    |          |           |          |                    |
|                 | <i>M/M/M/I</i> | 30       | 1         | 7.76     | 0.002              | 30       | 1         | 5.88     | 0.024              | 30       | 1         | 7.25     | 0.009              |
|                 | <i>M/M/I/I</i> | 30       | 1         | 6.32     | 0.018              | 30       | 1         | 0.15     | 0.704              | 30       | 1         | 0.04     | 0.844              |
|                 | <i>M/I/M/I</i> | 30       | 1         | 4.62     | 0.035              | 30       | 1         | 0.67     | 0.420              | 30       | 1         | 0.00     | 0.954              |
|                 | <i>M/I/I/I</i> | 30       | 1         | 0.06     | 0.802              | 30       | 1         | 4.21     | 0.042              | 30       | 1         | 5.91     | 0.024              |
|                 | <i>I/I/I/I</i> | 30       | 1         | 18.01    | 1x10 <sup>-5</sup> | 30       | 1         | 0.80     | 0.498              | 30       | 1         | 6.10     | 0.019              |

Plant densities and treatments are listed on the left. ***n***: number of observations. ***df***: degrees of freedom. ***F***: *F*-value from the type III sum of squares ANOVA for each factor. ***P***: Estimated probability of obtaining this *F*-value under the null hypothesis.
