# Supplementary material for: Differential Tolerance to Direct and Indirect Density-Dependent Costs of Viral Infection in Arabidopsis thaliana
Source: PLoS Pathog. 2009 Jul 31;5(7):e1000531. doi: 10.1371/journal.ppat.1000531 (PMC2712083; doi:10.1371/journal.ppat.1000531)
Supplement: Table S12 — Two-way ANOVAs of the impact of host plant density in the indirect cost of CMV infection [(Traiti/Traitm)Inter-class/(Traiti/Traitm)Intra-class] on Arabidopsis life-history, by using “plant density” and “accession” as factors. (0.02 MB PDF) [file ppat.1000531.s013.pdf]

**Table S12.** Two-way ANOVAs of the impact of host plant density in the indirect cost of CMV infection [ $(Trait/Trait_m)_{Inter-class}/(Trait/Trait_m)_{Intra-class}$ ] on *Arabidopsis* life-history, by using “plant density” and “accession” as factors.

| Trait                  | <i>n</i> | Plant Density |          |          | Accession |          |                    | D x A     |          |          |
|------------------------|----------|---------------|----------|----------|-----------|----------|--------------------|-----------|----------|----------|
|                        |          | <i>df</i>     | <i>F</i> | <i>P</i> | <i>df</i> | <i>F</i> | <i>P</i>           | <i>df</i> | <i>F</i> | <i>P</i> |
| <b>Ratio <i>RW</i></b> | 225      | 1             | 2.25     | 0.135    | 2         | 24.52    | 1×10 <sup>-5</sup> | 2         | 5.80     | 0.004    |
| <b>Ratio <i>IW</i></b> | 225      | 1             | 3.38     | 0.067    | 2         | 4.63     | 0.011              | 2         | 6.78     | 0.001    |
| <b>Ratio <i>SW</i></b> | 225      | 1             | 0.49     | 0.485    | 2         | 13.28    | 1×10 <sup>-5</sup> | 2         | 5.17     | 0.006    |

Traits (**Ratio *RW***:  $(RW/RW_m)_{Inter-class}/(RW/RW_m)_{Intra-class}$ ; **Ratio *IW***:  $(IW/IW_m)_{Inter-class}/(IW/IW_m)_{Intra-class}$ ; **Ratio *SW***:  $(SW/SW_m)_{Inter-class}/(SW/SW_m)_{Intra-class}$ ) are listed on the left. ***n***: number of observations. ***df***: degrees of freedom. ***F***: *F*-value from the type III sum of squares ANOVA for each factor. ***P***: Estimated probability of obtaining this *F*-value under the null hypothesis.
